# Supplementary material for: Osteogenic Efficacy of Human Trophoblasts-Derived Conditioned Medium on Mesenchymal Stem Cells
Source: MDPI journal article supplement (doi:10.3390/ijms231710196), 2022-09-05
Supplement: s1 [file s1]

## Supplementary

**Table S1.** Sequences of oligonucleotide primers for quantitative RT-PCR.

| Primer                          | Direction | Sequence               |
|---------------------------------|-----------|------------------------|
| <i>IBSP</i>                     | forward   | GAACAAGGCATAAACGGCACC  |
|                                 | reverse   | TTCTGCATTGGCTCCAGTGAC  |
| <i>ALP</i>                      | forward   | ACGAGCTGAACAGGAACAACGT |
|                                 | reverse   | CACCAGCAAGAAGAAGCCTTT  |
| <i>RUNX2</i>                    | forward   | GACACCACCAGGCCAATC     |
|                                 | reverse   | AGAACAAGGGGGCCGTTA     |
| <i>Osterix</i>                  | forward   | GCCAGAAGCTGTGAAACCTC   |
|                                 | reverse   | TGATGGGGTCATGGTGTCTA   |
| <i>OCN</i>                      | forward   | TGACGAGTTGGCTGACCA     |
|                                 | reverse   | AGGGTGCCTGGAGAGGAG     |
| <i>OPN</i>                      | forward   | AGGCATCACCTGTGCCATAC   |
|                                 | reverse   | GATGGGTCAGGGTTTAGCCA   |
| <i>PPAR-<math>\gamma</math></i> | forward   | GCTGTGCAGGAGATCACAGA   |
|                                 | reverse   | GGGCTCCATAAAGTCACCAA   |
| <i>Adiponectin</i>              | forward   | CCTAAGGGAGACATCGGTGA   |
|                                 | reverse   | GTAAAGCGAATGGGCATGTT   |
| <i>Leptin</i>                   | forward   | GGCTTTGGCCCTATCTTTTC   |
|                                 | reverse   | CCAAACCGGTGACTTTCTGT   |
| <i>BMP2</i>                     | forward   | GGACATGGTTGTGGAGGGTT   |
|                                 | reverse   | AAAGTGTCAACTGGGGTGGG   |
| <i>GREM</i>                     | forward   | AACAGTCGCACCATCATCAA   |

|               |         |                           |
|---------------|---------|---------------------------|
|               | reverse | CGATGGATATGCAACGACAC      |
| <i>CXCL1</i>  | forward | AAGTGTGAACGTGAAGTCCC      |
|               | reverse | GTCACTGTTTCAGCATCTTTTCG   |
| <i>CXCL3</i>  | forward | TGGTCACTGAACTGCGCT        |
|               | reverse | ATGCGGGGTTGAGACAAG        |
| <i>CXCL6</i>  | forward | AGAGCTGCGTTGCACTTGTT      |
|               | reverse | GCAGTTTACCAATCGTTTGGGG    |
| <i>CXCL8</i>  | forward | ACTGAGAGTGATTGAGAGTGGAC   |
|               | reverse | ACAACCCTCTGCACCCAGTT      |
| <i>CCL7</i>   | forward | AGAGCTGCGTTGCGTTTGT       |
|               | reverse | CTATGGCGAACACTTGCAGATTAC  |
| <i>CCL11</i>  | forward | TCTGTGCCTGCTGCTCATAG      |
|               | reverse | TGGAATCCTGAACCCACTTC      |
| <i>CCL13</i>  | forward | GTCCCCAGAAGGCTGTCATC      |
|               | reverse | GGACCCACTTCTCCTTTGGG      |
| <i>IL-6</i>   | forward | TCTTCAGAACGAATTGACAAACAAA |
|               | reverse | GCTGCTTTCACACATGTTACTCTTG |
| <i>MMP-1</i>  | forward | TTGAGAAAGCCTTCCAACCTCTG   |
|               | reverse | CTGCAACACGATGTAAGTTGTA    |
| <i>MMP-3</i>  | forward | TGCTGCTCATGAAATTGGCC      |
|               | reverse | TCATCTTGAGACAGGCGGAA      |
| <i>MMP-8</i>  | forward | TCTGCAAGGTTATCCCAAGG      |
|               | reverse | CTTGCTGGAAAACATGCATCA     |
| <i>MMP-13</i> | forward | AGCACCTTCTCATGACCTC       |

|              |         |                       |
|--------------|---------|-----------------------|
|              | reverse | TCTTTTGGAAGACCCAGTTCA |
| <i>GAPDH</i> | forward | TCGCCCCACTTGATTTTGG   |
|              | reverse | GCAAATTCCATGGCACCGT   |

**Table S2.** Antibodies used in western blot analysis.

| Antibodies     | Host   | Manufacturer   | Catalog # | Category  | Dilution |
|----------------|--------|----------------|-----------|-----------|----------|
| ERK1/2         | Rabbit | Cell Signaling | 9102S     | Primary   | 1:1000   |
| p-ERK1/2       | Rabbit | Cell Signaling | 9101S     | Primary   | 1:1000   |
| p38            | Rabbit | Cell Signaling | 9212S     | Primary   | 1:1000   |
| p-p38          | Rabbit | Cell Signaling | 9211S     | Primary   | 1:1000   |
| JNK            | Rabbit | Cell Signaling | 9252S     | Primary   | 1:1000   |
| p-JNK          | Rabbit | Cell Signaling | 9251S     | Primary   | 1:1000   |
| AKT            | Mouse  | Cell Signaling | 2920S     | Primary   | 1:1000   |
| p-AKT          | Rabbit | Cell Signaling | 9271S     | Primary   | 1:1000   |
| $\beta$ -actin | Mouse  | Santa Cruz     | sc4778    | Primary   | 1:200    |
| Mouse IgG-HRP  | Goat   | Abcam          | ab6789    | Secondary | 1:5000   |
| Rabbit IgG-HRP | Goat   | Abcam          | ab6721    | Secondary | 1:5000   |

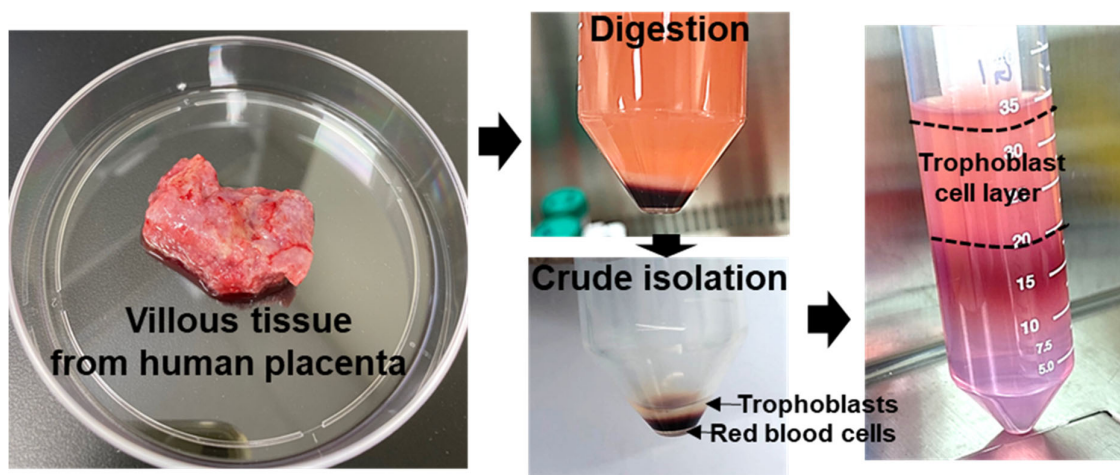

**Supplementary Figure S1. Isolation procedure of primary trophoblasts from the human placenta.**

Villous tissue isolated from the human placenta was digested with DNase and trypsin. Supernatants from the digestion process were collected and then centrifuged with fetal bovine serum. Crude trophoblasts were observed between the FBS and RBC (red blood cells) layers. They were subsequently obtained by density gradient centrifugation.

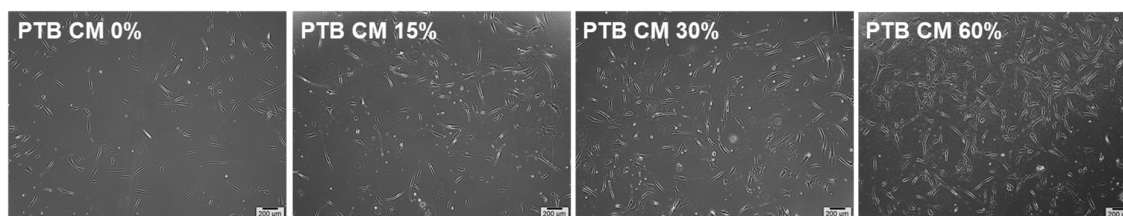

**Supplementary Figure S2. Proliferation effect of trophoblast-derived conditioned medium (TB-CM).**

Phase-contrast images of mesenchymal stem cells treated with 0, 15, 30, and 60% TB-CM for 24 h.
